# Supplementary material for: Production of 1,4:3,6-dianhydro-α-d-glucopyranose from methyl 3,6-anhydro-α-d-glucopyranoside and its taste identification
Source: Royal Society of Chemistry journal article supplement (doi:10.1039/d5ra00266d), 2025-01-01

## Supporting Information

### **Production of 1,4:3,6-Dianhydro- $\alpha$ -D-glucopyranose from Methyl 3,6-Anhydro- $\alpha$ -D-Glucopyranoside and its Taste Identification**

Zhifei Chen,<sup>a</sup> Yibo Ning,<sup>a</sup> Lei Li,<sup>a</sup> Xueying Cao,<sup>a</sup> Gaolei Xi,<sup>a</sup> Dongxu Cheng,<sup>a</sup> Qingfu Wang,<sup>\*a</sup> Changtong Lu<sup>\*a</sup> and Kai Yang<sup>\*,b</sup>

<sup>†</sup> Technology Center, China Tobacco Henan Industrial Limited Company, Zhengzhou, 450002, PR China

<sup>‡</sup> School of Chemistry and Chemical Engineering, Shandong University of Technology, Zibo, 255049, PR China

#### **Table of Contents:**

|                                                                                                                                     |       |
|-------------------------------------------------------------------------------------------------------------------------------------|-------|
| <b>Figure S1</b> ORTEP drawing of DGP.                                                                                              | S2    |
| <b>Scheme S1.</b> Intramolecular cyclization of 6- <i>O</i> -tosyl-glucopyranoside <b>3</b> Promoted by a Catalytic Amount of TBAF. | S3    |
| <b>NMR Spectral</b>                                                                                                                 | S4-S7 |

**Figure S1** ORTEP drawing of DGP.

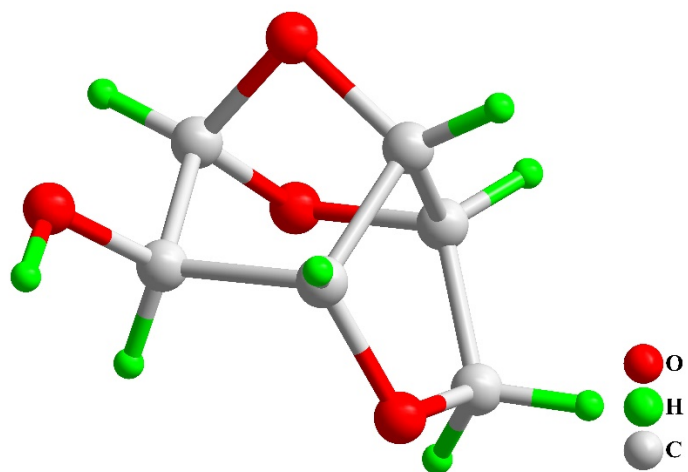

**Scheme S1.** Design of intramolecular cyclization of 6-*O*-tosyl-glucopyranoside **3** promoted by a catalytic amount of TBAF.

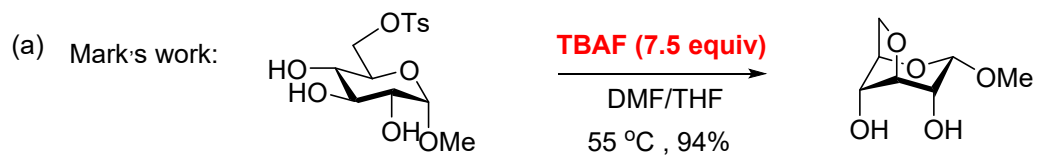

(b) Catalytic Reaction:

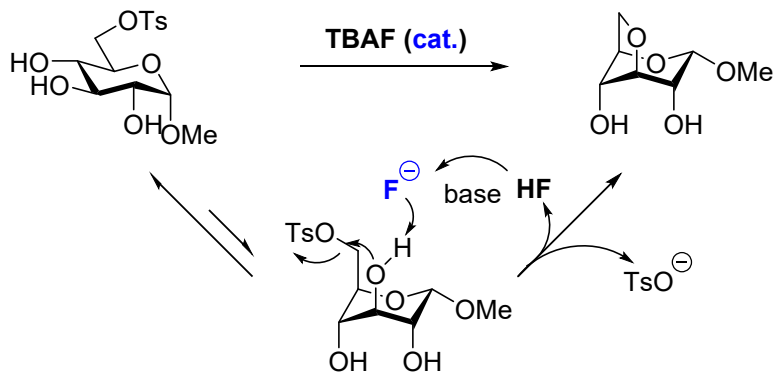

# **NMR Spectral:**

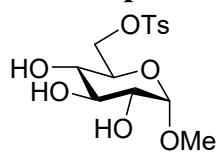

**3**

<sup>1</sup>H NMR spectrum of Compound 3

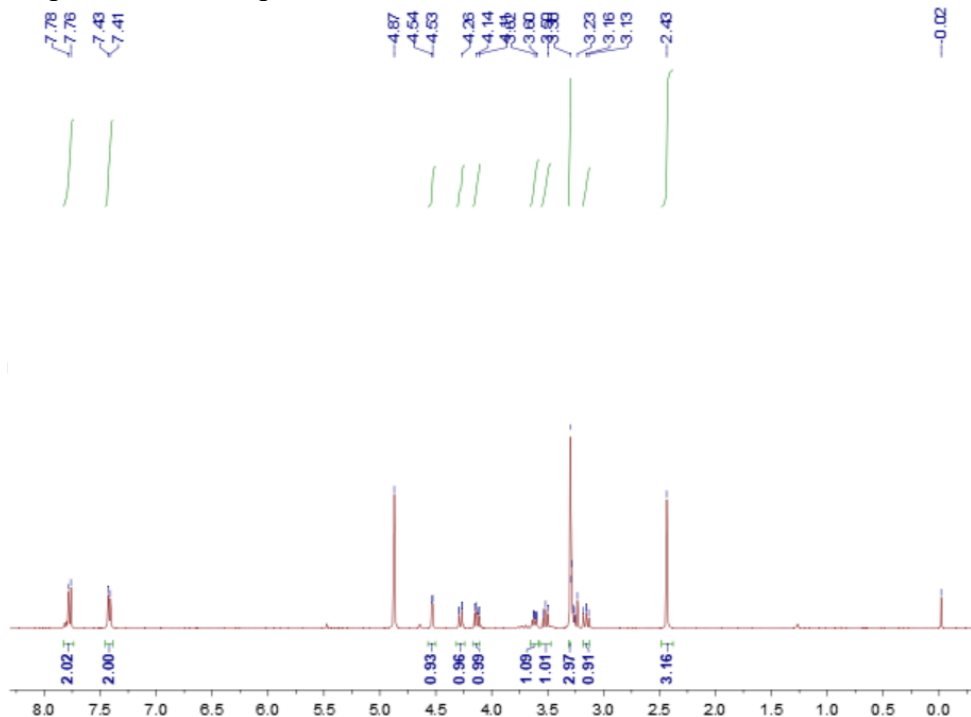

<sup>13</sup>C NMR spectrum of Compound 3

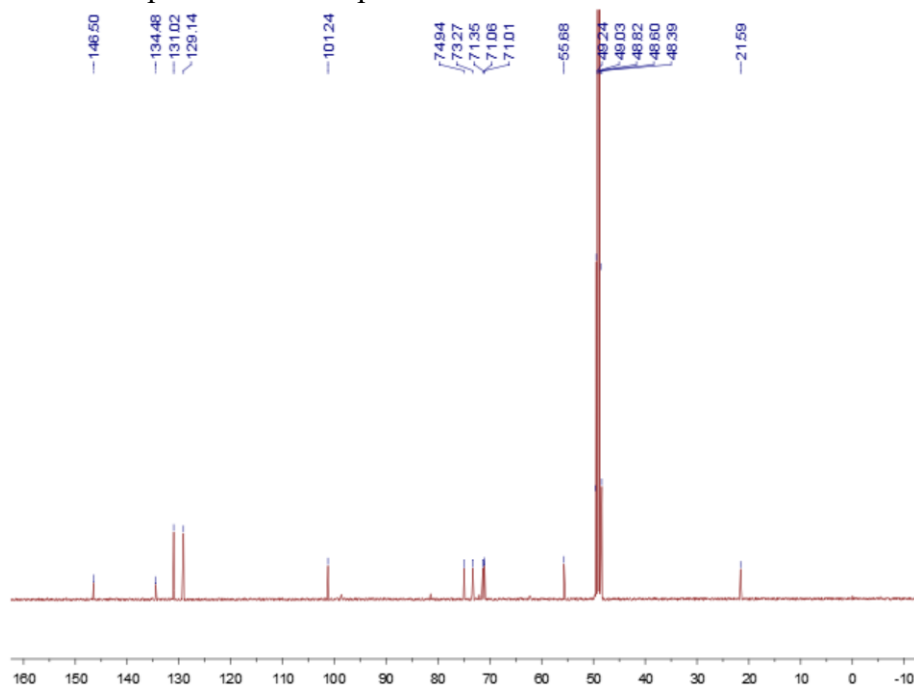

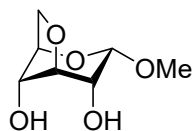

**1**

<sup>1</sup>H NMR spectrum of Compound **1**

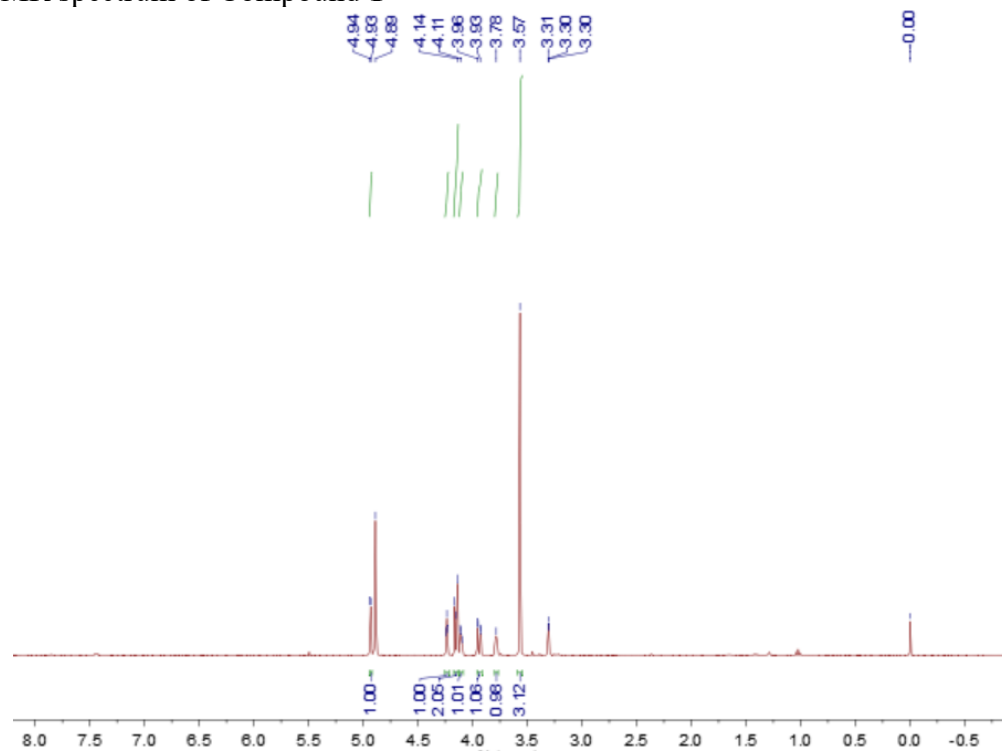

<sup>13</sup>C NMR spectrum of Compound **1**

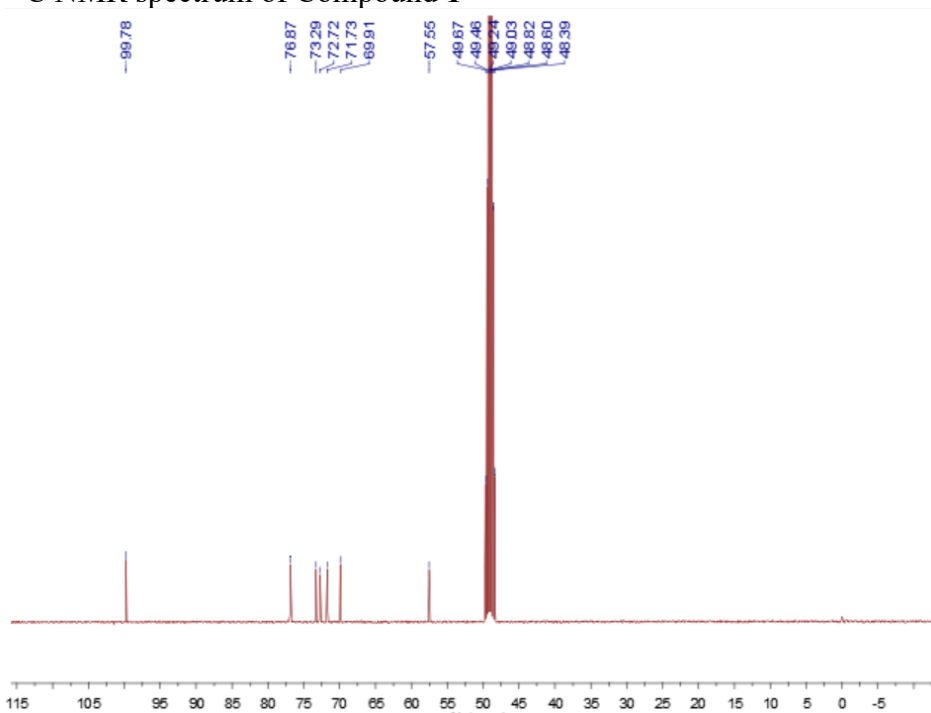

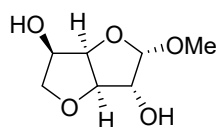

**2**

$^1\text{H}$  NMR spectrum of Compound **2**

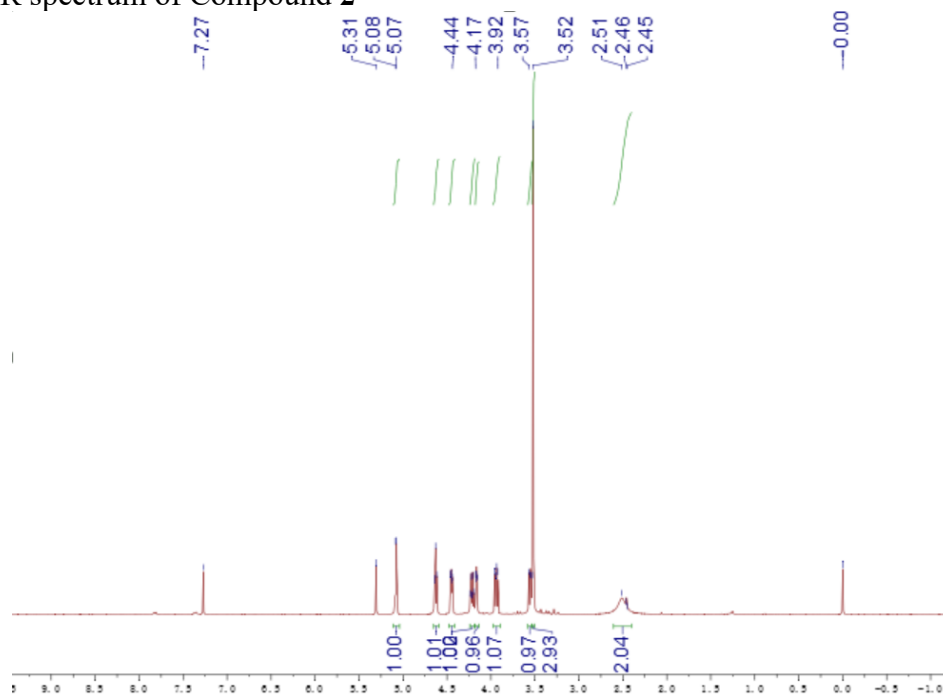

$^{13}\text{C}$  NMR spectrum of Compound **2**

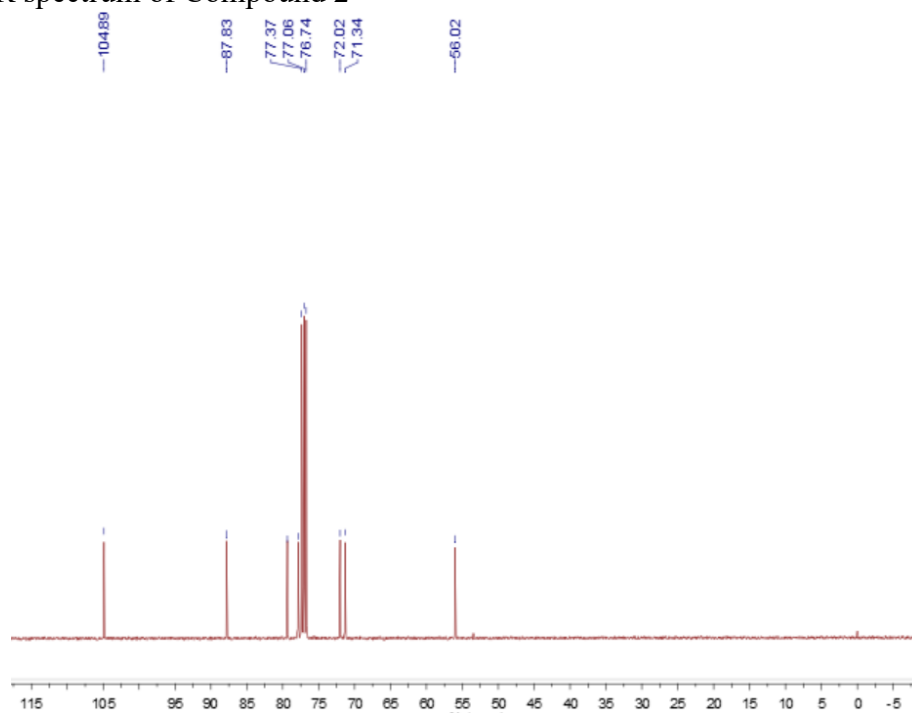

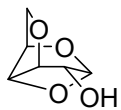

**DGP**

$^1\text{H}$  NMR spectrum of Compound **DGP**

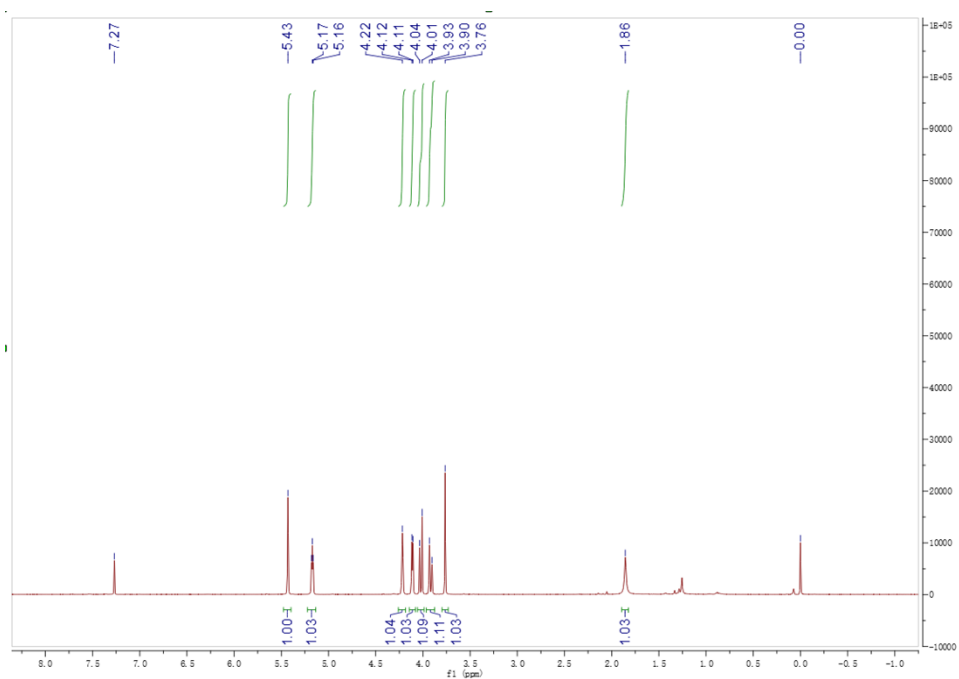

$^{13}\text{C}$  NMR spectrum of Compound **DGP**

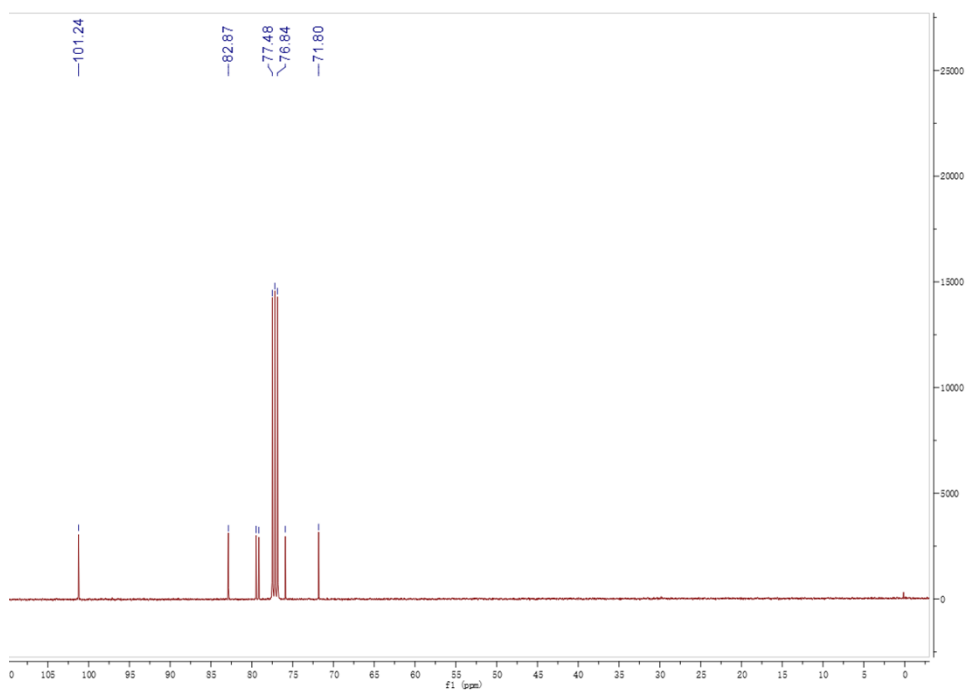

Supplement: d5ra00266d1.pdf [file d5ra00266d1.pdf]
